# Supplementary material
Source: PubMed Central journal article supplement (PMC5014058)
Supplement: rsif20160228supp3.pdf [file rsif20160228supp3.pdf]

Figure S3, percentage total molar phospholipid composition of the fifteen most abundant phospholipids in each lipidome.

| HL60 |      |              | HL60 <sub>oleate</sub> |      |              | HeLa  |      |              |
|------|------|--------------|------------------------|------|--------------|-------|------|--------------|
| Mean | SD   |              | Mean                   | SD   |              | Mean  | SD   |              |
| 8.05 | 2.55 | PE18:1/18:1  | 21.44                  | 6.89 | PE18:1/18:1  | 12.11 | 3.68 | PC16:0/18:1  |
| 6.99 | 2.80 | PE18:0/20:4  | 7.49                   | 2.24 | PC18:1/18:1  | 9.73  | 5.66 | PE18:1/18:1  |
| 6.38 | 1.66 | PC16:0/18:1  | 6.64                   | 1.71 | PC16:0/18:1  | 8.86  | 3.04 | PC18:1/18:1  |
| 4.72 | 1.71 | PE18:0/22:6  | 6.56                   | 2.32 | PE18:0/18:1  | 6.05  | 3.04 | PE18:0/18:1  |
| 4.23 | 1.49 | PE18:0/18:1  | 4.69                   | 1.98 | PE18:0/20:4  | 4.02  | 2.97 | PE16:0/18:1  |
| 3.83 | 1.25 | PE18:1/20:4  | 4.35                   | 3.82 | AG18:1/18:1  | 3.52  | 1.61 | PC16:0a/18:1 |
| 3.73 | 0.60 | PC16:0/16:1  | 4.29                   | 1.73 | PE18:1/20:4  | 2.96  | 0.71 | PE18:0/20:4  |
| 3.65 | 0.96 | PC18:1/18:1  | 3.48                   | 1.31 | PE18:0/22:6  | 2.96  | 1.00 | PC18:0/18:1  |
| 3.62 | 0.69 | PC16:1/18:1  | 2.46                   | 0.78 | PE16:0/18:1  | 2.74  | 1.02 | PC16:0/16:1  |
| 2.75 | 0.66 | PE16:0/18:1  | 2.18                   | 0.97 | PE18:0a/22:0 | 2.66  | 0.74 | PE18:1/20:4  |
| 2.69 | 0.72 | PE18:1/18:2  | 2.04                   | 0.63 | PE18:1/18:2  | 2.32  | 0.72 | PC16:0/18:2  |
| 2.54 | 1.06 | PE18:0/22:5  | 1.95                   | 0.81 | PE18:0/22:5  | 2.21  | 1.12 | PE18:0/20:2  |
| 2.52 | 0.92 | PE18:0a/22:0 | 1.71                   | 0.70 | PE18:0/20:2  | 1.88  | 0.64 | PC16:0/16:0  |
| 2.02 | 0.54 | PC18:1/18:2  | 1.64                   | 0.34 | PC16:0/18:2  | 1.78  | 0.67 | PC18:0/20:2  |
| 1.76 | 0.86 | PE18:0/20:3  | 1.54                   | 0.25 | PC16:0/16:1  | 1.72  | 0.74 | PC18:0a/18:2 |

  

| RAW 264.7 <sub>KDO</sub> |      |          | RAW 264.7 <sub>compactin</sub> |      |                     | BMDM <sub>ATP</sub> |      |                     |
|--------------------------|------|----------|--------------------------------|------|---------------------|---------------------|------|---------------------|
| Mean                     | SD   |          | Mean                           | SD   |                     | Mean                | SD   |                     |
| 6.76                     | 2.62 | PS(36:1) | 6.59                           | 1.89 | PC(36:2)            | 7.21                | 3.18 | PS(36:1)            |
| 3.27                     | 1.10 | PC(36:2) | 5.58                           | 1.49 | PC(32:1)            | 7.12                | 4.88 | PC(36:2)            |
| 2.82                     | 1.12 | PS(40:5) | 5.57                           | 1.45 | PS(36:1)            | 3.86                | 2.00 | PC(34:1)            |
| 2.74                     | 0.93 | PC(36:1) | 3.41                           | 0.84 | PC(34:1)            | 3.40                | 1.01 | PE(36:2)            |
| 2.62                     | 1.14 | PS(34:1) | 3.13                           | 1.35 | PC(36:1)            | 3.15                | 2.27 | PC(36:1)            |
| 2.60                     | 1.04 | PE(38:4) | 3.01                           | 1.04 | PE(38:4)            | 3.07                | 0.88 | PE(38:4)            |
| 2.51                     | 0.83 | PC(32:1) | 2.59                           | 0.88 | PE(36:2)            | 3.01                | 1.02 | PE(36:1)            |
| 2.36                     | 0.97 | PS(40:6) | 2.29                           | 0.62 | PE(36:1)            | 2.82                | 1.49 | PC(32:1)            |
| 2.23                     | 1.14 | PS(36:0) | 2.16                           | 0.81 | PS(34:1)            | 2.45                | 1.06 | PS(36:2)            |
| 1.97                     | 0.64 | PE(36:1) | 2.15                           | 0.61 | PC(34:2)            | 2.45                | 2.14 | PC(38:6)            |
| 1.80                     | 0.63 | PE(36:2) | 1.89                           | 0.53 | PE(38:5e)/PE(38:4p) | 2.43                | 1.00 | PS(38:4)            |
| 1.80                     | 0.78 | PI(38:4) | 1.80                           | 0.56 | PC(38:4)            | 2.32                | 0.97 | PS(34:1)            |
| 1.73                     | 0.73 | PI(38:3) | 1.57                           | 0.39 | PS(36:2)            | 2.07                | 1.98 | PC(40:6)            |
| 1.66                     | 0.70 | PS(36:2) | 1.54                           | 0.49 | PE(38:5)            | 1.96                | 1.01 | PE(38:5e)/PE(38:4p) |
| 1.66                     | 0.55 | PE(34:1) | 1.53                           | 0.42 | PE(34:1)            | 1.88                | 0.66 | PS(40:6)            |

| MDCK  |      |                | NEURO <sub>Altz</sub> |      |         | LDLR <sub>mouse</sub> |      |                     |
|-------|------|----------------|-----------------------|------|---------|-----------------------|------|---------------------|
| Mean  | SD   |                | Mean                  | SD   |         | Mean                  | SD   |                     |
| 11.25 | 1.91 | PC 34:1        | 12.50                 | 1.22 | PC 34:1 | 6.09                  | 0.76 | PS(36:1)            |
| 6.78  | 0.98 | PS 18:0-18:1   | 8.13                  | 1.18 | PC 32:0 | 5.43                  | 1.32 | PS(36:2)            |
| 6.22  | 1.55 | PC 36:2        | 5.56                  | 0.44 | PC 36:1 | 3.70                  | 1.12 | PS(38:4)            |
| 4.38  | 0.57 | PC 34:2        | 5.05                  | 1.85 | PS 36:1 | 3.30                  | 0.82 | PE(38:4)            |
| 3.67  | 0.43 | PC 32:1        | 4.97                  | 1.26 | PE 40:6 | 3.09                  | 0.44 | PS(34:1)            |
| 3.16  | 0.89 | PE 18:1-18:1   | 4.46                  | 1.00 | PI 38:4 | 2.97                  | 0.28 | PI(38:4)            |
| 3.02  | 0.98 | PE 18:0-18:1   | 3.70                  | 0.83 | PC 36:4 | 2.95                  | 0.45 | PE(38:5e)/PE(38:4p) |
| 2.94  | 0.90 | PI 18:0-20:4   | 3.58                  | 0.81 | PC 38:4 | 2.62                  | 1.72 | PS(40:4)            |
| 2.86  | 1.24 | PE O-18:1-20:4 | 3.55                  | 0.44 | PC 34:0 | 2.19                  | 0.92 | PC(36:2)            |
| 2.76  | 1.02 | PC 36:3        | 3.55                  | 0.16 | PC 36:2 | 2.18                  | 0.30 | PS(38:3)            |
| 2.43  | 0.50 | PI 18:0-20:3   | 2.82                  | 0.92 | PS 40:6 | 1.95                  | 0.40 | PC(38:6)            |
| 2.42  | 0.88 | PC 36:1        | 2.37                  | 0.24 | PC 32:1 | 1.92                  | 0.54 | PC(38:4)            |
| 2.05  | 0.93 | PE O-18:1-18:1 | 2.20                  | 0.17 | PC 38:6 | 1.72                  | 0.42 | PC(36:1)            |
| 1.86  | 0.66 | PI 18:0-18:1   | 2.14                  | 0.44 | PE 38:4 | 1.70                  | 0.37 | PS(40:5)            |
| 1.86  | 0.84 | PC 36:4        | 1.91                  | 0.32 | PC 40:6 | 1.65                  | 0.32 | PC(38:5)            |

#### BMDM<sub>compactin</sub>

| Mean | SD   |                     |
|------|------|---------------------|
| 7.55 | 4.79 | PS(36:1)            |
| 5.44 | 2.24 | PC(36:2)            |
| 4.44 | 3.93 | PC(40:7)            |
| 3.76 | 1.30 | PC(32:1)            |
| 3.31 | 1.72 | PC(36:1)            |
| 3.10 | 2.54 | PC(40:6)            |
| 2.91 | 1.27 | PC(34:1)            |
| 2.88 | 1.09 | PE(36:2)            |
| 2.54 | 0.97 | PE(36:1)            |
| 2.35 | 1.66 | PC(38:5)            |
| 2.33 | 1.40 | PS(36:2)            |
| 2.21 | 2.53 | PE(40:7e)/PE(40:6p) |
| 2.14 | 1.48 | PC(38:6)            |
| 2.14 | 1.14 | PS(34:1)            |
| 2.03 | 1.41 | PC(38:4)            |
